# Supplementary material
Source: PubMed Central journal article supplement (PMC7323920)
Supplement: NIHMS1595659-supplement-Supplementary_Appendix.pdf [file NIHMS1595659-supplement-Supplementary_Appendix.pdf]

# THE LANCET

## Respiratory Medicine

### Supplementary appendix

This appendix formed part of the original submission and has been peer reviewed. We post it as supplied by the authors.

Supplement to: Martinez L, Lo NC, Cords O, et al. Paediatric tuberculosis transmission outside the household: challenging historical paradigms to inform future public health strategies. *Lancet Respir Med* 2019; published online May 8. [http://dx.doi.org/10.1016/S2213-2600\(19\)30137-7](http://dx.doi.org/10.1016/S2213-2600(19)30137-7).

**Table S1: Household definition for included studies on proportion of tuberculosis infections acquired in the household.**

| First Author, Year          | Household/Contact Definition                                                                                                                                                 |
|-----------------------------|------------------------------------------------------------------------------------------------------------------------------------------------------------------------------|
| Conversion Studies          |                                                                                                                                                                              |
| Martinez, 2018              | Not specified                                                                                                                                                                |
| Andrews, 2017               | Not specified                                                                                                                                                                |
| Khan, 2018                  | Not specified                                                                                                                                                                |
| Disease Progression Studies |                                                                                                                                                                              |
| Martinez, 2018              | Not specified                                                                                                                                                                |
| Nachman, 2011               | Not specified                                                                                                                                                                |
| Cross-Sectional Surveys     |                                                                                                                                                                              |
| Martinez, 2017              | Each study in metanalysis has individual definition, listed below†                                                                                                           |
| Olender, 2003               | Households are built next to each other and made of woven thatch walls with roofs of plastic coverings, usually containing 1 or 2 bedrooms.                                  |
| Roelsgaard, 1955 – 1960     | A household constitutes a group of people who live and eat together.                                                                                                         |
| Radhakrishna, 1968 – 1983   | A household was defined as a group of persons living together and sharing food from the same kitchen                                                                         |
| Khan, 2016                  | Two definitions for contact were used: (i) Living in close proximity (<200 meters) and (ii) living in the same household††                                                   |
| Dorjee, 2018                | Not specified                                                                                                                                                                |
| Cranmer, 2014               | Mothers, a subset of whom brought their male partners                                                                                                                        |
| Lule, 2015                  | Not specified                                                                                                                                                                |
| Ganmaa, 2018                | Not specified                                                                                                                                                                |
| Molecular Studies           |                                                                                                                                                                              |
| Schaaf, 2003                | A household was defined as people living and sleeping in the same house or group of houses/shacks on the same residential site using the same cooking and ablution amenities |
| Marais, 2009                | Household contacts were defined as children living at the same residential address at the time of diagnosis.                                                                 |
| Guthrie, 2018               | Not specified – ‘regularly residing in the household’                                                                                                                        |
| Mathematical Modeling       |                                                                                                                                                                              |

---

Andrews, 2014

---

Not specified

---

---

† Not all studies from this systematic review described their definition of the 'household'.

†† Living in close proximity to a known case of infectious TB modeled as a linear variable (>200 m, 100-200 m, <100 m, within the household)
